# Supplementary material
Source: PubMed Central journal article supplement (PMC4902586)
Supplement: supp_pp.15.01921_PP2015-01921DR2_Supplemental_Materialtbls.pdf [file supp_pp.15.01921_PP2015-01921DR2_Supplemental_Materialtbls.pdf]

1 **Supplemental Table S1** Primers used in vector construction.

2

| Primers                   | Usage             | Sequence                                                                                                               |
|---------------------------|-------------------|------------------------------------------------------------------------------------------------------------------------|
| OsWRKY76p                 | promoter          | Forward: 5'-ATC TgC AgA TCC ggA CgC Agg CTC AAT g-3'<br>Reverse: 5'-AgA gAT CTC gCC ACg CCg CgT CCA TCg AC-3'          |
| OsWRKY62p                 | promoter          | Forward: 5'-gAC TgC AgA ggC TgC CAC TTT AgT CCC T-3'<br>Reverse: 5'-Tgg gAT CCg TCg gTg ACg ATg AgC CgT Cg-3'          |
| OsWRKY76.1                | BiFC/localization | Forward: 5'-AgT ggA TCC TCg TCg TCg TCg ATg gAC g-3'<br>Reverse: 5'-AAg gTC gAC gAA TTC ggg CAg CTT CT-3'              |
| OsWRKY76.2                | BiFC/localization | Forward: 5'-AgT ggA TCC ACT AgT TCg TCg TCg TCg ATg gAC g-3'<br>Reverse: 5'-AAg gTC gAC gAA TTC ggg CAg CTT CT-3'      |
| OsWRKY62.1                | BiFC/localization | Forward: 5'-AgT ggA TCC CTT AgC TgC CgC CAT ggA CgA C-3'<br>Reverse: 5'-AAg CTC gAg CAA ATg AAC Agg AAT gTg Tgg gAT-3' |
| OsWRKY62.2                | BiFC/localization | Forward: 5'-AgT ggA TCC ATg gAg gAg AAC gCg Cgg-3'<br>Reverse: 5'-AAg CTC gAg CAA ATg AAC Agg AAT gTg Tgg gAT-3'       |
| BD-OsWRKY76.1             | Y2H               | Forward: 5'-TCC CCC ggg AAT ggA CgC ggC gTg gC-3'<br>Reverse: 5'-AAC TgC AgC TAg AAT TCg ggC AgC TTC-3'                |
| AD-OsWRKY76.1             | Y2H               | Forward: 5'-TCC CCC ggg AAT ggA CgC ggC gTg gC-3'<br>Reverse: 5'-AAg gTC gAC gAA TTC ggg CAg CTT CT-3'                 |
| BD/AD-OsWRKY76.2          | Y2H               | Forward: 5'-TCC CCC ggg AAT ggA CgC ggC gTg gC-3'<br>Reverse: 5'-AAg gTC gAC gAA TTC ggg CAg CTT CT-3'                 |
| BD-OsWRKY76ΔC(48-110)     | Y2H               | Forward: 5'-CCg gAA TTC TCC AAg TCg ATg ACC AAT g-3'<br>Reverse: 5'-AAC TgC AgC TAC CTg CTC CTC TTC-3'                 |
| BD-OsWRKY76ΔN (169-327)   | Y2H               | Forward: 5'-ggA ATT CTA CCA ATg gCg gAA gTA Cg-3'<br>Reverse: 5'-AAC TgC AgC TAT TCg ggC AgC TTC Tgg-3'                |
| BD/AD-OsWRKY62.1          | Y2H               | Forward: 5'-AgT CCC ggg CTT AgC TgC CgC CAT ggA CgA C-3'<br>Reverse: 5'-AAg CTC gAg CAA ATg AAC Agg AAT gTg Tgg gAT-3' |
| BD/AD-OsWRKY62.2          | Y2H               | Forward: 5'-AgT ggA TCC ATg gAg gAg AAC gCg Cgg-3'<br>Reverse: 5'-AAg CTC gAg CAA ATg AAC Agg AAT gTg Tgg gAT          |
| BD/AD-OsWRKY62ΔN(50 -318) | Y2H               | Forward: 5'-Agg gAT CCC gAA TgC TCg ACg CCA TTC Tgg-3'                                                                 |

| Primers                   | Usage              | Forward                                                       | Reverse: 5'-AAg CTC gAg CAA ATg AAC Agg AAT gTg Tgg gAT-3'        |
|---------------------------|--------------------|---------------------------------------------------------------|-------------------------------------------------------------------|
| AD-OsWRKY62ΔC(1-70)       | Y2H                | Forward: 5'-AgT CCC ggg CTT AgC TgC CgC CAT ggA CgA C-3'      | Reverse: 5'-ATC TCg AgC gAC AgC gAC ggC gCC AAg Ag-3'             |
| pBridge-OsWRKY76.2        | Y3H                | Forward: 5'-TgC ggC CgC AgC TgC gAT ggA CgC ggC gTg gC-3'     | Reverse: 5'-gAA gAT CTC TAg AAT TCg ggC AgC TTC-3'                |
| pBridge-OsWRKY62.2        | Y3H                | Forward: 5'-TTg ATA TCC gAT ggA ggA gAA CgC gCg g-3'          | Reverse: 5'-ggA AgA TCT CTA CAA ATg AAC Agg AAT gTg Tgg gAT-3'    |
| OsWRKY76.1ox              | Over-expression    | Forward: 5'-AgT ggA TCC gTC gTC gTC gTC gAT ggA Cg-3'         | Reverse: 5'-AgT AAg CTT gAA TTC ggg CAg CTT CTg-3'                |
| OsWRKY62.1ox              | Over-expression    | Forward: 5'-AgT ggA TCC TT AgC TgC CgC CAT ggA CgA C-3'       | Reverse: 5'-AAg AAg CTT CAA ATg AAC Agg AAT gTg Tgg gAT-3'        |
| OW62 RNAi                 | dsOW62/76          | Forward: 5'-AgT CTg CAg gAg CTC ATg gAC gAC gAC ggC gA-3'     | Reverse: 5'-AAg ggA TCC TTg CTg Tgg Cgg AAg gCg g-3'              |
| OW62/76 RNAi              | dsOW62/76          | Forward: 5'-AgT CTg CAg gAg CTC ATg gAC gAC gAC ggC gA-3'     | Reverse: 5'-AAg CTC gAg ggA TCT TCg CCT CgT CAT Tgg-3'            |
| pET-OsWRKY76.1-myc        | Protein expression | Forward: 5'-AgT ggA TCC ACT AgT TCg TCg TCg TCg ATg gAC g-3'  | Reverse: 5'-AAg gTC gAC gAA TTC ggg CAg CTT CT-3'                 |
| pET-OsWRKY76.1-flag       | Protein expression | Forward: 5'-AgT ggA TCC ACT AgT TCg TCg TCg TCg ATg gAC g-3'  | Reverse: 5'-ggC CCg ggg AAT TCg ggC AgC TTC T-3'                  |
| pET-OsWRKY62.1-myc        | Protein expression | Forward: 5'-AgT ggA TCC TTA gCT gCC gCC ATg gAC gAC-3'        | Reverse: 5'-AAg CTC gAg CAA ATg AAC Agg AAT gTg Tgg gAT-3'        |
| pET-OsWRKY62.1-flag       | Protein expression | Forward: 5'-AgT ggA TCC TTA gCT gCC gCC ATg gAC gAC-3'        | Reverse: 5'-AAg AAg CTT CCC ggg CAAATg AAC Agg AAT gTg Tgg gAT-3' |
| pGEX-OsWRKY76.1N(1-230)   | Protein expression | Forward: 5'-AgT ggA TCC ACT AgT TCg TCg TCg TCg ATg gAC g-3'  | Reverse: 5'-AAg gTC gAC ggC gCg Cgg AgA Cgg gTg Cg-3'             |
| pGST-OsWRKY62.1N(1-205)   | Protein expression | Forward: 5'-AgT ggA TCC TTA gCT gCC gCC ATg gAC gAC-3'        | Reverse: 5'-AAg CTC gAg CgT ggA CAg ggC ATg gTT gT-3'             |
| pGST-OsWRKY76.1C(165-327) | Protein expression | Forward: 5'-ATg gAT CCT CgA Tgg TCA Agg ACg ggT ACC AAT gg-3' | Reverse: 5'-AAg gTC gAC gAA TTC ggg CAg CTT CT-3'                 |

|                               |                          |                                                                            |
|-------------------------------|--------------------------|----------------------------------------------------------------------------|
| pGST-OsWRKY76.1-WRKY(165-224) | Protein expression       | Forward: 5'-AgT ggA TCC gTC AAg gAC ggg TAC CAA Tg-3'                      |
|                               |                          | Reverse: 5'-AAg gTC gAC ggC gCg Cgg AgA Cgg gTg Cg-3'                      |
| pGST-OsWRKY62.1-WRKY(143-201) | Protein expression       | Forward: 5'-AgT ggA TCC gTg AAg gAT ggg TAC CAA Tg-3'                      |
|                               |                          | Reverse: 5'-AAg CTC gAg CgT ggA CAg ggC ATg gTT gT-3'                      |
| pWGus-OsWRKY76.1/76.2         | transcriptional activity | Forward: 5'-TCC CCC ggg AAT ggA CgC ggC gTg gC-3'                          |
|                               |                          | Reverse: 5'-AAg CTg CAg CTA gAA TTC ggg CAg CTT CT-3'                      |
| pWGus-OsWRKY62.1              | transcriptional activity | Forward: 5'-AgT ggA TCC CTT AgC TgC CgC CAT ggA CgA C-3'                   |
|                               |                          | Reverse: 5'-AAg CTg CAg CTA CAA ATg AAC Agg AAT gTg Tgg gAT-3'             |
| pWGus-OsWRKY62.2              | transcriptional activity | Forward: 5'-AgT ggA TCC ATg gAg gAg AAC gCg Cgg-3'                         |
|                               |                          | Reverse: 5'-AAg CTg CAg CTA CAA ATg AAC Agg AAT gTg Tgg gAT-3'             |
| pWGus-OsWRKY62.1d1            | transcriptional activity | Forward: 5'-Agg Cgg gCg ATg gAg gAg AAC gCg Cg-3'                          |
|                               |                          | Reverse: 5'-ATC CTC ggC Cgg CgA TCg gCT gAA gA-3'                          |
| pWGus-OsWRKY62.1d2            | transcriptional activity | Forward: 5'-Agg Cgg gCg ATg gAg gAg AAC gCg Cg-3'                          |
|                               |                          | Reverse: 5'-CCC ggC ggC ggC gCT gTC gTC ggT Cg-3'                          |
| pWGus-OsWRKY62.1d3            | transcriptional activity | Forward: 5'-Agg Cgg gCg ATg gAg gAg AAC gCg Cg-3'                          |
|                               |                          | Reverse: 5'-TgA CgA TgA gCC gTC gCC gTC-3'                                 |
| pWGus-OsWRKY62.1d18           | transcriptional activity | Forward: 5'-TAG gAT CCA Tgg ggC TTT TgC CgC TCT TCA gC-3'                  |
|                               |                          | Reverse: 5'-AAg CTg CAg CTA CAA ATg AAC Agg AAT gTg Tgg gAT-3'             |
| pWGus-OsWRKY62.1d29           | transcriptional activity | Forward: 5'-ATg gAT CCA Tgg Agg ATC TTg Agg AgA AgC Tg-3'                  |
|                               |                          | Reverse: 5'-AAg CTg CAg CTA CAA ATg AAC Agg AAT gTg Tgg gAT-3'             |
| pWGus-OsWRKY62.1d35           | transcriptional activity | Forward: 5'-ATg gAT CCA TgC TgA ggC ggg CgA Tgg Ag-3'                      |
|                               |                          | Reverse: 5'-AAg CTg CAg CTA CAA ATg AAC Agg AAT gTg Tgg gAT-3'             |
| pWGus-OsWRKY62.1m1            | transcriptional activity | Forward: 5'-AgC CgA TCg CCg gCC gCg gCT gCT gCg gCg gCg CTg Agg Cgg gCg-3' |
|                               |                          | Reverse: 5'-gAA gAg Cgg CAA AAg CCC ggC ggC g-3'                           |
| pWGus-OsWRKY62.1m2            | transcriptional activity | Forward: 5'-gCg gCC gCC gCC gCC gCC gCC gCC ggg CT-3'                      |
|                               |                          | Reverse: 5'-TgA CgA TgA gCC gTC gCC gTC-3'                                 |

4  
5  
6

7  
8  
9

**Supplemental Table S2** Gene-specific primers for PCR detection.

| Primers     | RAP locus ID | Usage  | Forward                                           | Reverse                                       |
|-------------|--------------|--------|---------------------------------------------------|-----------------------------------------------|
| OsWRKY76q   | Os09g0417600 | qPCR   | 5'-Agg TCg CgT CgC Cgg AgT TC-3'                  | 5'-TCg ggC AgC TTC Tgg Agg ATC g-3'           |
| OsWRKY62q   | Os09g0417800 | qPCR   | 5'-TgC AAg TgC TCA AgA ACg ACg-3'                 | 5'-ATg AAC Agg AAT gTg Tgg gAT T-3'           |
| OsWRKY62.1q | Os09g0417800 | qPCR   | 5'-TTC AgC CgA TCg CCg gCC gAg-3'                 | 5'-gCg Tgg TgA CCg gCC AgA AT -3'             |
| OsWRKY62.2q | Os09g0417800 | qPCR   | 5'-CCg ATC gCC ggT CTg TCC gT-3'                  | 5'-CCA CgC gCA ATC ACA TCA CA-3'              |
| PR1a        | Os07g0129200 | qPCR   | 5'-gAg CTC gTg Cgg gCA CTA CAC-3'                 | 5'-TgA TgA AgA CgC CgA ggT CgC-3'             |
| Ubiquitin   | Os06g0681400 | qPCR   | 5'-gTg gTg gCC AgT AAg TCC TC-3'                  | 5'-ggA CAC AAT gAT TAg ggA TCA-3'             |
| PR1b        | Os07g0127700 | qPCR   | 5'-ATC TAT gTA gCC ggA TTg TgT g-3'               | 5'-CAC AgC gAC gTC gTT TAT TCC-3'             |
| PR10        | Os12g0555500 | qPCR   | 5'-gAC ATC gTg gAT ggC TAC TAT gg-3'              | 5'-TCA CTC ACT CTA ggT ggg ATA TAC-3'         |
| OsWRKY71    | Os02g0181300 | qPCR   | 5'-TTC AAg gCg gCg CTC gTC AC-3'                  | 5'-CgC CgC gTC gAT CAg TAG CA-3'              |
| OsWRKY28    | Os06g0649000 | qPCR   | 5'-CgA CCA AgA ACT gAT CCA TCg T-3'               | 5'-AgC CAT gCA AAT CgA TCA ACT C-3'           |
| CPS2        | Os02g0571100 | qPCR   | 5'-TCg ATg ggC ACA TCT CCA Agg T-3'               | 5'-gAg CCA TgC Tgg TAg ACA CAA C-3'           |
| CPS4        | Os04g0178300 | qPCR   | 5'-gCT gCA gCg CTA TTA ACA gAC T-3'               | 5'-TTg TCT CAg gTg AgC AgT Agg C-3'           |
| PAL         | Os02g0627100 | qPCR   | 5'-gAg AAg ACA CgA TCg CCT gg-3'                  | 5'-TCC ACT CCT TgA ggC ACT CgA-3'             |
| MAS         | Os04g0179200 | qPCR   | 5'-AAA TgA TTT ggg ACC AgT Cg-3'                  | 5'-gAC AgA ATC TAg CTA gCg ATg gA-3'          |
| CYP71Z7     | Os02g0570700 | qPCR   | 5'-ACC CAA Tgg AAT gTT gCC CA-3'                  | 5'-gTg CTg TCT Tgg Agg ACg TA-3'              |
| LOX         | Os08g0508800 | qPCR   | 5'-CTg CCg TAC CAg CTg ATg AAg C-3'               | 5'-AgA TTT ggg AgT gAC ATA TTg gTT-3'         |
| Mo18S       |              | qPCR   | 5'-TAC gAg Agg AAC CgC TCA TTC AgA TAA TTA-3'     | 5'-TCA gCA gAT CgT AAC gAT AAA gCT ACT C-3'   |
| OsWRKY62    | Os09g0417800 | RT-PCR | 5'-TTA gCT gCC gCC ATg gAC gAC g-3'               | 5'-Tgg TCA Cgg CCT CCA CgA ACT C-3'           |
| OsWRKY76    | Os09g0417600 | RT-PCR | 5'-AgT ggA TCC TCg TCg TCg ATg gAC g-3'           | 5'-AAg gTC gAC gAA TTC ggg CAg CTT CT-3'      |
| OsWRKY71    | Os02g0181300 | RT-PCR | 5'-TCg TTC gCC gAT ggA TCC gTg-3'                 | 5'-TCA gTC gAC ATC CTT ggT Cgg CgA gAg CT-3'  |
| OsWRKY28    | Os06g0649000 | RT-PCR | 5'-TTA CAg ATC TTC AAT TCA Tgg ATT CgT ggA TTg-3' | 5'-TCA AAg CTT CTT ggT Cgg CgA gAg CTC gAg-3' |
| Actin       | Os03g0718100 | RT-PCR | 5'-ggA ACT ggT ATg gTC AAg gC-3'                  | 5'-AgT CTC ATg gAT ACC CgC Ag-3'              |

10  
11  
12  
13  
14
